# Supplementary material for: Suppressive Antibiotic Therapy for Spinal Hardware Infection: A Retrospective Cohort Study
Source: Research Square preprint supplement (doi:10.21203/rs.3.rs-7120988/v1), 2025-08-13
Supplement: Supplementary file 1 [file 1bdc1edffcbcea302e693ae5.docx]

Suppressive Antibiotic Therapy for Spinal Hardware Infection: A Retrospective Cohort Study

Supplementary Materials:

Supplementary Table 1: Univariate Analysis showing the Association of SAT and other variables with Recurrence of Infection among patients with Late onset infection

| Variable | Total N =38 (%) | No Recurrence  N= 34 (89.5%) | Recurrence N=4 (10.5%) | OR (CI)  Univariate | P value |
| --- | --- | --- | --- | --- | --- |
| SAT | | | | |  |
| No | 15 (39.5) | 13 (34.2) | 2 (5.3) |  |  |
| Yes | 23 (60.5) | 21 (55.3) | 2 (5.3) | .62 (.08-4.95) | .65 |
| SAT duration                N=22.      N=18 (81.2).     N= 4 (18.2) | | | | |  |
| > 52weeks | 12(54.6) | 10 (45.5) | 2 (9.1)) | – |  |
| 24-52 weeks | 5 (22.7) | 5 (22.7) | 0 (0.0) |  |  |
| <24 weeks | 5 (22.7) | 5 (22.7) | 0 (0.0) |  |  |
| SAT duration 2 | | | | |  |
| <=12 weeks | 5 (22.7) | 5(22.7) | 0 (0.0) | – |  |
| >12 weeks | 17 (77.3) | 15 (68.2) | 2 (9.1) |  |  |
| Hardware status | | | | |  |
| All removed | 20 (52.6) | 19 (50.0) | 1 (2.6) |  |  |
| Partial revision | 15 (39.5) | 12 (31.6) | 3 (7.9) | 4.75 (.44-51.11) | .20 |
| All retained | 3 (7.9) | 3 (7.9) | 0 (0.0) |  |  |
| Organism | | | | |  |
| Non *S.aureus* | 23 (60.5) | 20 (52.63) | 3 (7.9) |  |  |
| *S.aureus* | 15 (39.5) | 14 (36.8) | 1 (2.6) | .48 (.04-5.06) | .53 |

Supplementary Table 2: Median Time to Recurrence of SHI by SAT Duration

| Time to recurrence on SAT  (Weeks) N=8 | Median time to recurrence (weeks) χ2 3.26. P=.20 |
| --- | --- |
| <24; N=3 | 12 |
| 24-52; N=2 | 41.5 |
| >52; N=3 | 24 |
